# Supplementary material for: LIF and BMP signaling generate separate and discrete types of GFAP-expressing cells
Source: Oxford University Press journal article supplement (doi:10.1242/dev.02166), 2005-11-28
Supplement: dev02166table1.pdf [file dev02166table1.pdf]

**Table S1. Clonal analysis of BMP4 effects on astrocyte differentiation**

---

|                   | Control  | BMP4     |
|-------------------|----------|----------|
| Total progeny     | 124      | 102      |
| GFAP <sup>+</sup> | 27 (22%) | 98 (96%) |
| BrdU <sup>+</sup> | 34 (27%) | 1 (1%)   |
| Death             | 7 (6%)   | 3 (3%)   |

---

Clonal analysis was performed on 100 P1 cells plated individually in Terasaki wells under control conditions (EGF 10 ng/ml), and on 100 cells plated in the presence of BMP4 (10 ng/ml BMP4 + EGF 10 ng/ml). Cells were pulsed with BrdU for 12 hours to assay proliferation, live/dead staining was performed to assess cell death, and GFAP immunocytochemistry was performed on day 7 to assay astrocyte differentiation. BMP treatment prompted exit from the cell cycle (lack of BrdU incorporation) without altering cell survival, and 96% of the cells expressed GFAP. Thus, BMP4 acts as an instructive rather than stochastic/selective cue to promote astrocyte differentiation.

---
